# Supplementary material for: Coupled flower-like Bi2S3 and graphene aerogels for superior sodium storage performance
Source: Royal Society of Chemistry journal article supplement (doi:10.1039/c7nr06921a), 2017-01-01
Supplement: c7nr06921a1.pdf [file c7nr06921a1.pdf]

## Supporting Information

# Coupled Flower-like Bi<sub>2</sub>S<sub>3</sub> and Graphene Aerogels for Superior Sodium Storage Performance

Yu Zhang<sup>a</sup>, Lishuang Fan,<sup>b,c\*</sup> Pengxiang Wang,<sup>a</sup> Yanyou Yin,<sup>a</sup> Xinyu Zhang,<sup>a</sup> Naiqing Zhang<sup>b,c\*</sup>,  
Kening Sun<sup>b, c\*</sup>

<sup>a</sup>School of Chemistry and Chemical Engineering, Harbin Institute of Technology, Harbin 150000, China

<sup>b</sup>State Key Laboratory of Urban Water Resource and Environment, Harbin Institute of Technology, Harbin 150000, China

<sup>c</sup>Academy of Fundamental and Interdisciplinary Sciences, Harbin Institute of Technology, Harbin, 150001, China

\*Correspondence to: [znqmww@163.com](mailto:znqmww@163.com) (N.Q. Zhang)

### EXPERIMENT SECTION:

**1. Materials synthesis:** Graphene oxide aqueous solution was prepared by oxidation graphite powder according to a modified Hummers method.[1] For Bi<sub>2</sub>S<sub>3</sub>/GAs composites: first, 0.54 g Bi(NO<sub>3</sub>)<sub>3</sub>·5H<sub>2</sub>O, 0.52 g ethylenediaminetetraacetic acid disodium salt dehydrate(EDTA-2Na·2H<sub>2</sub>O) and 70 mL GO(1 mg mL<sup>-1</sup>) were mixed by ultrasonic treatment for 1 h and stirred for another 30 min; Next, 0.41 g L-cysteine was added to suspension and stirring for 30 min. Subsequently, the as-prepared suspension was hydrothermally treated at 180 °C for 24 h in 100 mL autoclave; and the obtained Bi<sub>2</sub>S<sub>3</sub>/GAs was washed with water and ethanol several times, and finally freeze-dried for 3 days. The Bi<sub>2</sub>S<sub>3</sub> were obtained using the same condition, but without GO.

**2. Materials characterization:** XRD patterns was determined by PANalytical X'Pert PRO (Cu K $\alpha$  radiation). The morphology of the products was characterized by Field-emission scanning electron microscope (Hitachi Limited SU-8010) and the nanostructure was characterized by transmission electron microscopy (Tecnai G2F30, FEI, US). X-ray photoelectron spectroscopy (XPS) was conducted with a Thermo

Fisher Scientific K-Alpha(Fisher Scientific Ltd, Nepean, ON). Thermogravimetric analysis (TGA) was performed in air with  $10\text{ }^{\circ}\text{C min}^{-1}$ .

**3. Electrochemical measurements:** The working electrode slurry was prepared by mixing active materials, Super-P, carboxymethyl cellulose in a weight ratio of 7:2:1, and deionized water as solvent. The slurry was pressed onto a cleaned copper foil by a doctor-balding method and dried in a vacuum oven at  $80\text{ }^{\circ}\text{C}$  overnight. The thickness of the prepared electrode film is  $100\text{ }\mu\text{m}$  and the loading of active material is  $0.2\sim0.5\text{ mg cm}^{-2}$ . The performance of the SIBs was tested using standard 2032 type coin cells in an argon-filled glovebox. The separator was Glass fiber (GF/D) from Whatman, sodium foils was used as counter and reference electrodes, and the electrolyte was  $1.0\text{ M NaCF}_3\text{SO}_3$  in DIGLYME. The cells were galvanostatically charged and discharged over a cutoff voltage window of  $0.01\sim3.00\text{ V}$  at room temperature on a battery test system (Shenzhen Neware Electronic Co., China). Cyclic voltammetry behavior was studied by CHI 650d electrochemical workstation at a scan rate of  $0.2\text{ mV s}^{-1}$ . Electrical impedance spectroscopy (EIS) measurements were carried out on Princeton Applied Research PARSTAT 2273 advanced electrochemical system with  $5\text{ mV}$  amplitude over the frequency range between  $100\text{ KHz}$  and  $10\text{ mHz}$ .

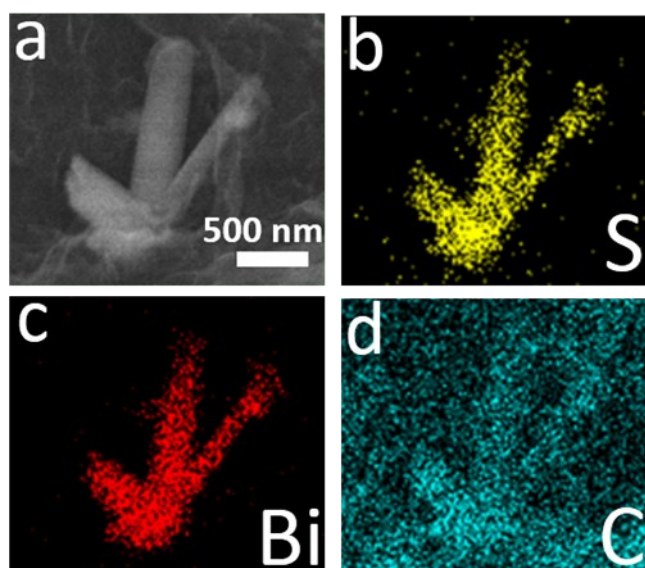

**Fig S1.** EDX mappings of Bi, S, and C in the selected area of  $\text{Bi}_2\text{S}_3/\text{GAs}$ .

**Table 1.** Comparison of sodium storage performance of Bi<sub>2</sub>S<sub>3</sub>/GAs with other reported carbon containing materials.

| Sample                                                    | Cycle stability                                                      | Rate capability                                            | Cut-off      | References |
|-----------------------------------------------------------|----------------------------------------------------------------------|------------------------------------------------------------|--------------|------------|
|                                                           | Capacity/Current/Cycles<br>mAh g <sup>-1</sup> /A g <sup>-1</sup> /n | Capacity/Current<br>mAh g <sup>-1</sup> /A g <sup>-1</sup> | voltage<br>V |            |
| Bi <sub>2</sub> S <sub>3</sub> /GAs                       | 397/0.1/50                                                           | 336/2                                                      | 0.01~3       | This work  |
| Bi <sub>2</sub> S <sub>3</sub> /PPy                       | 381/0.3/100                                                          | 335/1.2                                                    |              | 2          |
| SnS/rGO                                                   | 386/0.1/100                                                          | 240/0.4                                                    | 0.01~2       | 3          |
| Co <sub>3</sub> S <sub>4</sub> /PANI                      | 252.5/0.2/100                                                        | 189.3/2                                                    | 0.05~2       | 4          |
| MoS <sub>2</sub> /carbon paper                            | 286/0.08/100                                                         | 205/1                                                      | 0.01~3       | 5          |
| Co <sub>3</sub> S <sub>4</sub> /graphene                  | 329/0.5/50                                                           | 307/2                                                      | 0.005~3      | 6          |
| MnS/RGO                                                   | 308/0.1/125                                                          | 118/0.8                                                    | 0.01~2.6     | 7          |
| NiS/rGO                                                   | 160/0.2/10                                                           |                                                            | 0.005~3      | 8          |
| SnO <sub>2</sub> /NG                                      | 238/0.04/100                                                         | 170/0.6                                                    | 0.01~3       | 9          |
| MWNT/Fe <sub>2</sub> O <sub>3</sub> /C                    | 272/0.16/100                                                         | 251/1                                                      | 0.05~3       | 10         |
| SnO <sub>2</sub> /Graphene aerogels                       | 322/0.02/100                                                         | 220/0.64                                                   | 0.01~3       | 11         |
| Li <sub>4</sub> Ti <sub>5</sub> O <sub>12</sub> /graphene | 195/0.035/115                                                        | 58/2.1                                                     | 0.05~3       | 12         |
| SnO <sub>2</sub> /Graphene Dual Aerogel                   | 270/0.2/20                                                           | 184/1                                                      | 0.01~2.5     | 13         |

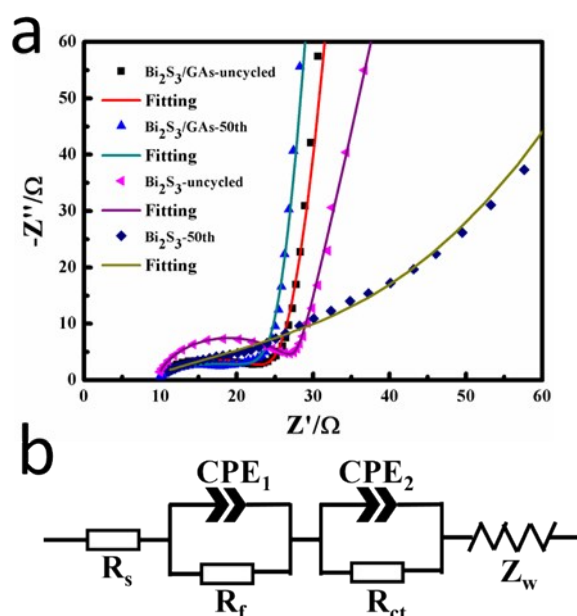

**Fig S2.** (a) EIS analysis of Bi<sub>2</sub>S<sub>3</sub>/GAs and Bi<sub>2</sub>S<sub>3</sub> before and after cycling. (b) Equivalent circuits used for fitting the experimental EIS data.

**Table S2** Fitting result of EIS spectra with the equivalent circuit proposed.

| Samples                            | Before cycles |                  | After 50 cycles |                  |
|------------------------------------|---------------|------------------|-----------------|------------------|
|                                    | $R_s(\Omega)$ | $R_{ct}(\Omega)$ | $R_s(\Omega)$   | $R_{ct}(\Omega)$ |
| $\text{Bi}_2\text{S}_3/\text{GAs}$ | 8.59          | 15.84            | 8.37            | 16.3             |
| $\text{Bi}_2\text{S}_3$            | 9.42          | 27.09            | 6.78            | 194              |

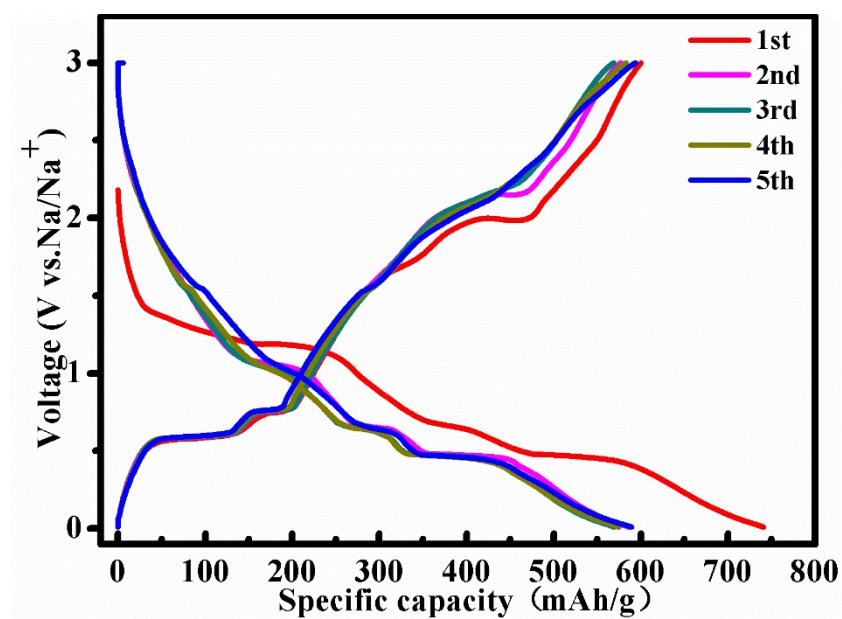

**Fig S3.** The first five discharge/charge profiles of  $\text{Bi}_2\text{S}_3$  between 0.01 V and 3.0 V at a current density of  $100 \text{ mA g}^{-1}$ .

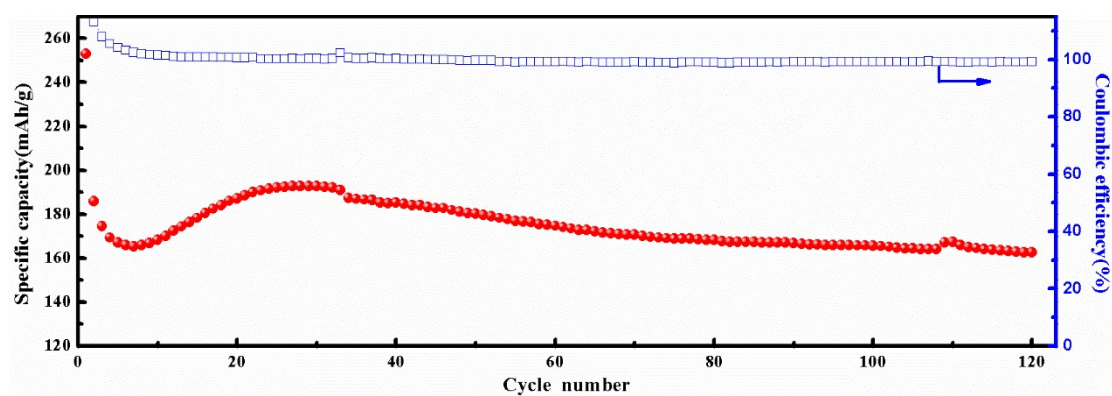

**Fig S4.** The cycle performance of individual graphene aerogels at  $1 \text{ A g}^{-1}$ .

## REFERENCES:

1. L. Fan, Y. Zhang, Q. Zhang, X. Wu, J. Cheng, N. Zhang, Y. Feng, K. Sun. *Small*, 2016, **12**, 5208-5216.
2. H. Liang, J. Ni and L. Li, *Nano Energy*, 2017, **33**, 213-220.
3. L. Wu, H. Lu, L. Xiao, X. Ai, H. Yang and Y. Cao, *J. Power Sources*, 2015, **293**, 784-789.
4. Q. Zhou, L. Liu, Z. Huang, L. Yi, X. Wang and G. Cao, *J. Mater. Chem. A*, 2016, **4**, 5505-5516.
5. X. Xie, T. Makaryan, M. Zhao, K. L. Van Aken, Y. Gogotsi and G. Wang, *Adv. Energy Mater.*, 2016, **6**, 1502161.
6. Y. Du, X. Zhu, X. Zhou, L. Hu, Z. Dai and J. Bao, *J. Mater. Chem. A*, 2015, **3**, 6787-6791.
7. X. Xu, S. Ji, M. Gu and J. Liu, *ACS Appl Mater Interfaces*, 2015, **7**, 20957-20964.
8. Q. Pan, J. Xie, T. Zhu, G. Cao, X. Zhao and S. Zhang, *Inorg. Chem*, 2014, **53**, 3511-3518.
9. X. Xie, D. Su, J. Zhang, S. Chen, A. K. Mondal and G. Wang, *Nanoscale*, 2015, **7**, 3164-3172.
10. Y. Zhao, Z. Feng and Z. J. Xu, *Nanoscale*, 2015, **7**, 9520-9525.
11. X. Xie, S. Chen, B. Sun, C. Wang and G. Wang, *ChemSusChem*, 2015, **8**, 2948-2955.
12. C. Chen, H. Xu, T. Zhou, Z. Guo, L. Chen, M. Yan, L. Mai, P. Hu, S. Cheng, Y. Huang and J. Xie, *Adv. Energy Mater.*, 2016, **6**, 1600322.
13. Z. Li, J. Ding, H. Wang, K. Cui, T. Stephenson, D. Karpuzov and D. Mitlin, *Nano Energy*, 2015, **15**, 369-378.
